# Supplementary material
Source: PubMed Central journal article supplement (PMC11028049)
Supplement: 262_2019_2363_MOESM1_ESM.pdf [file 262_2019_2363_MOESM1_ESM.pdf]

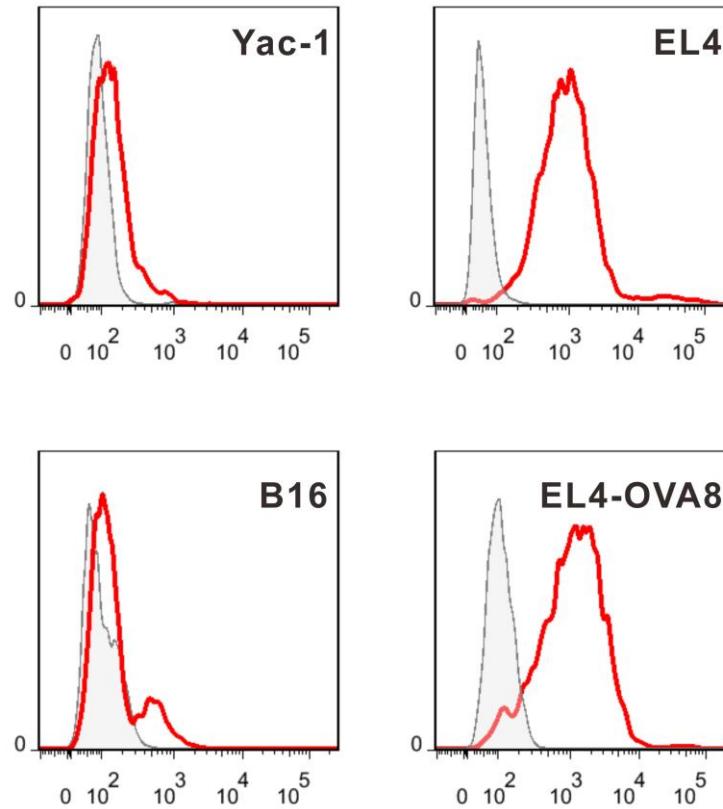

**Supplementary Figure 1. MHC-I expression detection on different tumor cell lines.**

Grey filled histograms show isotype controls, while red solid lines show the expression of H<sub>2</sub>K<sup>b</sup> on indicated tumor cell lines.

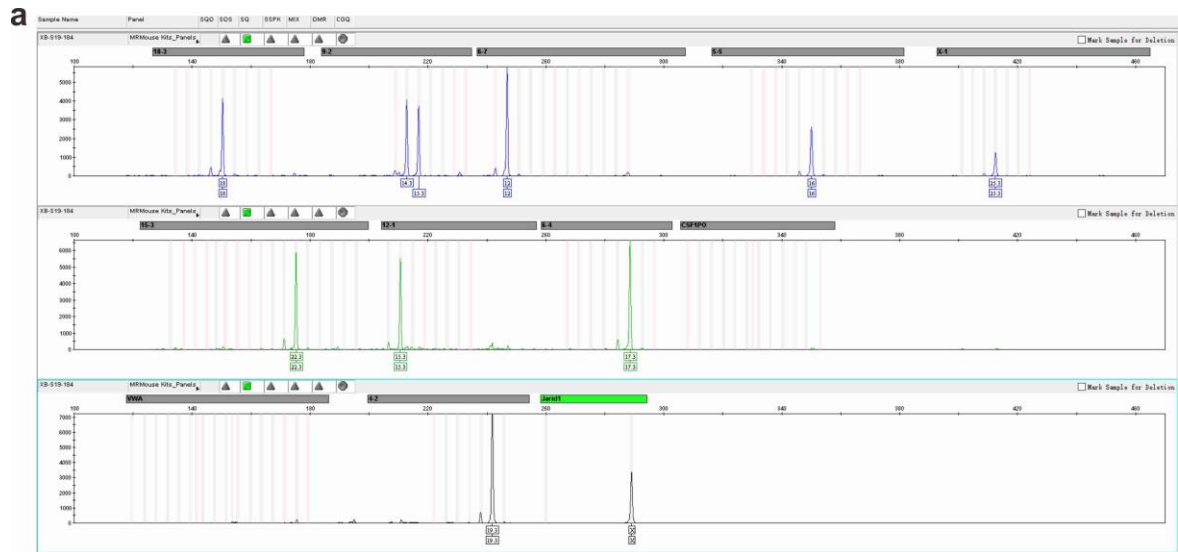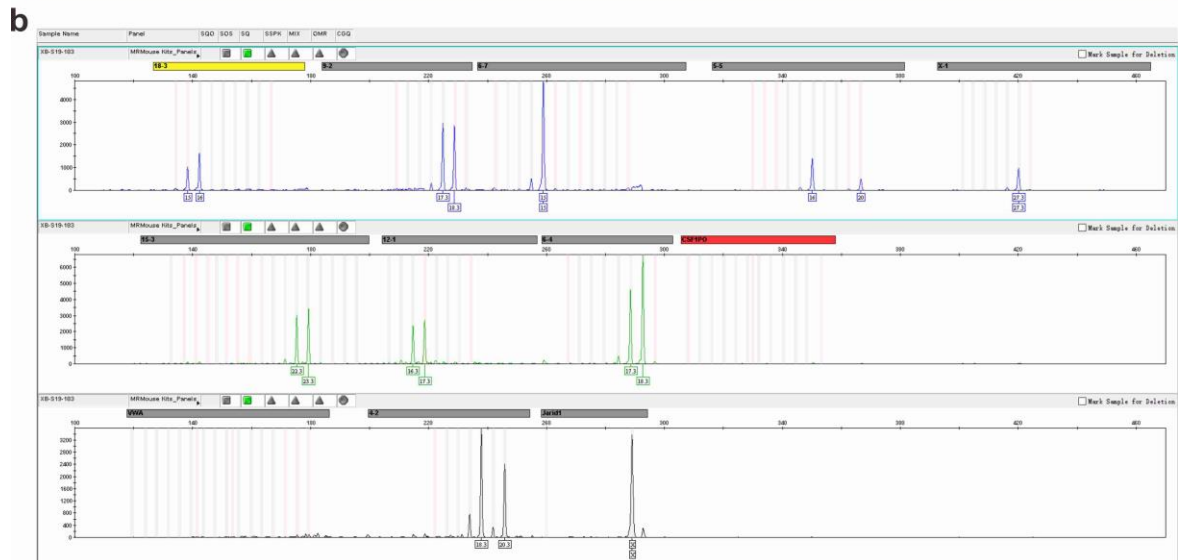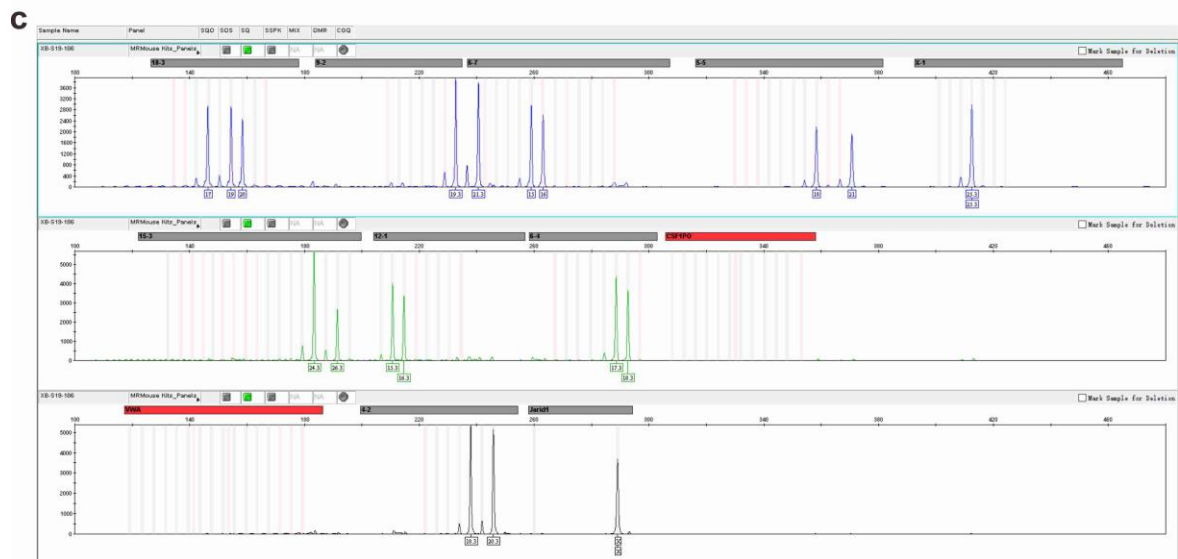

## Supplementary Figure 2. STR profiles of murine cell lines.

PCR amplification was performed using STR Multi-amplification Kit (Mouse STR v2.0) and PCR products were assayed with 3730xl DNA Analyzer (Applied Biosystems®). STR profiles of murine Yac-1 (a), B16-F10 (b) and EL4 (c) were shown.

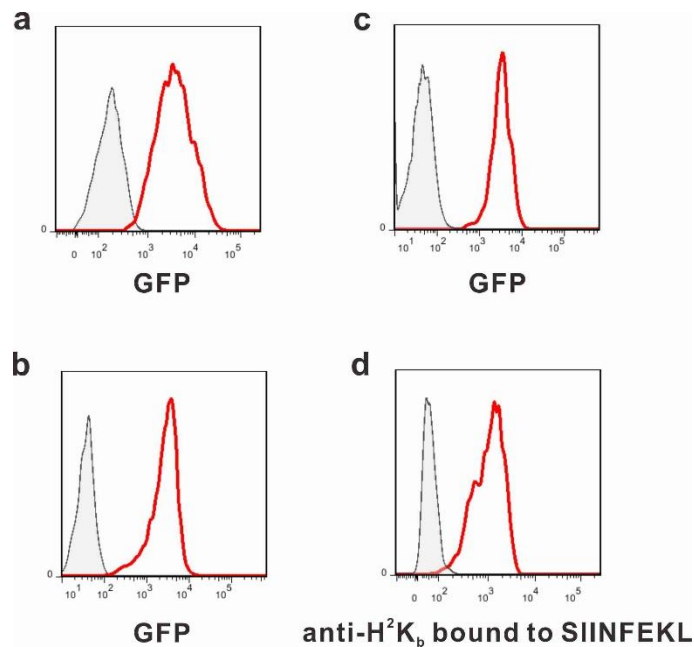

## Supplementary Figure 3. GFP/OVA<sub>257-264</sub> Expression of transfected murine cell lines.

*a.* GFP expression on B16-GFP cells (red line) and B16-F10 control cells (grey histogram). *b.* GFP expression on EL4-GFP cells (red line) and EL4 control cells (grey histogram). *c.* GFP expression on EL4-OVA8-GFP cells (red line) and EL4 control cells (grey histogram). *d.* Detection of OVA<sub>257-264</sub> expression using anti-H<sup>2</sup>K<sub>b</sub> bound to SIINFEKL on EL4-OVA8-GFP cells (red line) and EL4-GFP (grey histogram) cells.
